# Supplementary material
Source: HighWire-hosted journal article supplement (https://erj.ersjournals.com/content/58/6/2004474)
Supplement: inline-supplementary-material-1 [file inline-supplementary-material-1.pdf]

## Supplemental material

**Supplementary Table S1: ICD-10 and CCAM codes used to identify chronic respiratory diseases, respiratory complications, and potential confounding factors**

| Codes                                                                                                                                 | Respiratory disease                           |
|---------------------------------------------------------------------------------------------------------------------------------------|-----------------------------------------------|
| <b>Chronic respiratory disease</b>                                                                                                    |                                               |
| J961                                                                                                                                  | Chronic respiratory failure                   |
| C34 and C45                                                                                                                           | Lung cancer                                   |
| I270                                                                                                                                  | Pulmonary hypertension - PH                   |
| G473                                                                                                                                  | Sleep apnea                                   |
| J40, J41, J42 and J44                                                                                                                 | Chronic obstructive pulmonary disease - COPD  |
| J43 and J982                                                                                                                          | Emphysema                                     |
| J45 and J46                                                                                                                           | Asthma                                        |
| D86                                                                                                                                   | Pulmonary sarcoidosis                         |
| J84                                                                                                                                   | Interstitial lung disease                     |
| E840                                                                                                                                  | Cystic fibrosis with pulmonary manifestations |
| <b>Respiratory complication</b>                                                                                                       |                                               |
| J10, J11, J12, J13, J14, J15, J16, J17, and J18<br>associated with CCAM codes<br>GLLD006, GLLD015, GLLD008, GLLD004, GLLD007, GLLD009 | Ventilator-acquired pneumonia                 |
| B206 and B59                                                                                                                          | Pneumocystis pneumonia                        |
| B440 and B441                                                                                                                         | Aspergillosis pneumonia                       |
| J86                                                                                                                                   | Pleural empyema                               |
| J85                                                                                                                                   | Lung abscess                                  |
| J93                                                                                                                                   | Pneumothorax                                  |
| J96                                                                                                                                   | Acute respiratory failure                     |
| I26                                                                                                                                   | Pulmonary embolism                            |

**Potential confounding factors**

E66 except E6603, E6613, E6683, E6693

E10, E11, E12, E13, E14, O24

I10, I11, I12, I13, I15, O10, O13 and O16

I50

Obesity

Diabetes

Hypertension

Heart failure

---

**Supplementary Table S2: Respiratory history of patients hospitalized in France for COVID-19 (from March 1 to April 30, 2020) or seasonal influenza (from December 1, 2018 to February 28, 2019), according to their age at admission**

**COVID19**

| <b>Age strata (years)</b>                         | <b>&lt;18</b> | <b>18-30</b>  | <b>31-40</b>  | <b>41-50</b>  | <b>51-60</b>  | <b>61-70</b>   | <b>71-80</b>    | <b>81-90</b>    | <b>&gt;90</b> |
|---------------------------------------------------|---------------|---------------|---------------|---------------|---------------|----------------|-----------------|-----------------|---------------|
| <b>Number of patients</b>                         | 1,227         | 4,384         | 6,065         | 8,892         | 13,110        | 15,345         | 16,265          | 17,841          | 6,401         |
| Chronic respiratory failure (%)                   | 10 (0.81) *   | 5 (0.11) \$   | 18 (0.3) \$   | 46 (0.52) \$  | 110 (0.84) \$ | 276 (1.8) \$   | 410 (2.52) \$   | 435 (2.44) \$   | 123 (1.92)    |
| Sleep apnea (%)                                   | 4 (0.33)      | 10 (0.23)     | 71 (1.17) *   | 212 (2.38) \$ | 599 (4.57)    | 979 (6.38)     | 987 (6.07)      | 635 (3.56)      | 87 (1.31)     |
| Pulmonary hypertension (%)                        | 0 (0)         | 2 (0.05)      | 2 (0.03) \$   | 8 (0.09)      | 24 (0.18) \$  | 63 (0.41)      | 91 (0.56)       | 112 (0.63) \$   | 39 (0.61)     |
| Chronic obstructive pulmonary disease (%)         | 3 (0.24)      | 8 (0.18) \$   | 31 (0.51) \$  | 129 (1.45) \$ | 448 (3.42) \$ | 1,120 (7.3) \$ | 1,469 (9.03) \$ | 1,342 (7.52) \$ | 316 (4.94) \$ |
| Asthma (%)                                        | 105 (8.56) *  | 248 (5.66) \$ | 308 (5.08) \$ | 504 (5.67) \$ | 601 (4.58) \$ | 562 (3.66) \$  | 456 (2.80) \$   | 375 (2.10) \$   | 114 (1.78) \$ |
| Cystic fibrosis with pulmonary manifestations (%) | 4 (0.33)      | 6 (0.14) \$   | 4 (0.07) \$   | 6 (0.07)      | 0 (0) \$      | 0 (0)          | 0 (0)           | 0 (0)           | 0 (0)         |
| Lung cancer (%)                                   | 0 (0)         | 2 (0.05)      | 5 (0.08)      | 32 (0.36) \$  | 135 (1.03) \$ | 312 (2.03) \$  | 311 (1.91)      | 158 (0.89) *    | 22 (0.34)     |
| Emphysema (%)                                     | 1 (0.08)      | 7 (0.16)      | 21 (0.35)     | 83 (0.93)     | 192 (1.46) \$ | 418 (2.72) \$  | 392 (2.41) *    | 260 (1.46) *    | 52 (0.81) *   |
| Pulmonary sarcoidosis (%)                         | 0 (0)         | 3 (0.07)      | 12 (0.20)     | 21 (0.24)     | 35 (0.27)     | 41 (0.27) \$   | 33 (0.20)       | 12 (0.07)       | 2 (0.03)      |
| Interstitial lung diseases (%)                    | 10 (0.81) *   | 23 (0.52) *   | 46 (0.76)     | 99 (1.11)     | 223 (1.70)    | 350 (2.28) *   | 403 (2.48) *    | 379 (2.12) *    | 78 (1.22) *   |

**Seasonal influenza**

| <b>Age strata (years)</b>                         | <b>&lt;18</b> | <b>18-30</b>  | <b>31-40</b>  | <b>41-50</b>   | <b>51-60</b>  | <b>61-70</b>     | <b>71-80</b>     | <b>81-90</b>     | <b>&gt;90</b> |
|---------------------------------------------------|---------------|---------------|---------------|----------------|---------------|------------------|------------------|------------------|---------------|
| <b>Number of patients</b>                         | 8,942         | 1,836         | 1,568         | 1,626          | 3,164         | 5,624            | 7,693            | 11,276           | 4,090         |
| Chronic respiratory failure (%)                   | 31 (0.35) *   | 25 (1.36) \$  | 21 (1.34) \$  | 60 (3.69) \$   | 191 (6.04) \$ | 448 (7.97) \$    | 498 (6.47) \$    | 478 (4.24) \$    | 78 (1.91)     |
| Sleep apnea (%)                                   | 11 (0.12)     | 7 (0.38)      | 8 (0.51) *    | 56 (3.44) \$   | 142 (4.49)    | 349 (6.21)       | 455 (5.91)       | 378 (3.35)       | 37 (0.90)     |
| Pulmonary hypertension (%)                        | 3 (0.03)      | 2 (0.11)      | 6 (0.38) \$   | 3 (0.18)       | 12 (0.38) \$  | 31 (0.55)        | 49 (0.64)        | 106 (0.94) \$    | 35 (0.86)     |
| Chronic obstructive pulmonary disease (%)         | 16 (0.18)     | 12 (0.65) \$  | 17 (1.08) \$  | 128 (7.87) \$  | 522 (16.5) \$ | 1,186 (21.09) \$ | 1,295 (16.83) \$ | 1,208 (10.71) \$ | 253 (6.19) \$ |
| Asthma (%)                                        | 528 (5.9) *   | 147 (8.01) \$ | 132 (8.42) \$ | 177 (10.89) \$ | 232 (7.33) \$ | 265 (4.71) \$    | 314 (4.08) \$    | 337 (2.99) \$    | 98 (2.40) \$  |
| Cystic fibrosis with pulmonary manifestations (%) | 19 (0.21)     | 32 (1.74) \$  | 20 (1.28) \$  | 4 (0.25)       | 2 (0.06) \$   | 0 (0)            | 1 (0.01)         | 1 (0.01)         | 0 (0)         |
| Lung cancer (%)                                   | 0 (0)         | 2 (0.11)      | 2 (0.13)      | 12 (0.74) \$   | 64 (2.02) \$  | 147 (2.61) \$    | 123 (1.60)       | 73 (0.65) *      | 8 (0.20)      |
| Emphysema (%)                                     | 9 (0.1)       | 4 (0.22)      | 7 (0.45)      | 22 (1.35)      | 98 (3.1) \$   | 182 (3.24) \$    | 126 (1.64) *     | 89 (0.79) *      | 16 (0.39) *   |
| Pulmonary sarcoidosis (%)                         | 0 (0)         | 2 (0.11)      | 6 (0.38)      | 8 (0.49)       | 15 (0.47)     | 26 (0.46) \$     | 16 (0.21)        | 7 (0.06)         | 1 (0.02)      |

|                                |             |            |           |           |           |             |              |              |             |
|--------------------------------|-------------|------------|-----------|-----------|-----------|-------------|--------------|--------------|-------------|
| Interstitial lung diseases (%) | 12 (0.13) * | 3 (0.16) * | 15 (0.96) | 22 (1.35) | 41 (1.30) | 83 (1.48) * | 130 (1.69) * | 133 (1.18) * | 32 (0.78) * |
|--------------------------------|-------------|------------|-----------|-----------|-----------|-------------|--------------|--------------|-------------|

---

\* significantly more frequent in the COVID-19 group (p<0.05)

\$ significantly more frequent in the seasonal influenza group (p<0.05)

**Supplementary Table S3: Respiratory complications of patients hospitalized in France for COVID-19 (from March 1 to April 30, 2020) or seasonal flu (from December 1, 2018 to February 28, 2019)**

|                                     | <b>COVID-19</b>    | <b>2018-2019 seasonal flu</b> | <b>p-value</b> |
|-------------------------------------|--------------------|-------------------------------|----------------|
| <b>Number of patients</b>           | 89,530             | 45,819                        |                |
| Pulmonary embolism n (%)            | <b>3086 (3.45)</b> | 412 (0.90)                    | <0.0001        |
| Ventilator-acquired pneumonia n (%) | 7803 (8.72)        | <b>1710 (3.73)</b>            | <0.0001        |
| Pneumocystis pneumonia n (%)        | 3 (0.00)           | <b>22 (0.05)</b>              | <0.0001        |
| Aspergillosis pneumonia n(%)        | 210 (0.23)         | 112 (0.24)                    | 0.7240         |
| Pleural empyema n (%)               | 72 (0.08)          | 44 (0.10)                     | 0.3531         |
| Lung abscess n (%)                  | 103 (0.12)         | 60 (0.13)                     | 0.4247         |
| Pneumothorax n (%)                  | <b>374 (0.42)</b>  | 89 (0.19)                     | <0.0001        |

Groups where prevalence is significantly increased are bolded

**Supplementary Table S4: Respiratory morbidity, need for ICU and mortality of the patients hospitalized in France for COVID-19 (from March 1 to April 30, 2020): comparison between patients with and without chronic respiratory disease (for patients with CRD, we included patients with only one CRD)**

|                               | CF        | Lung cancer  | COPD          | Asthma       | Pulmonary sarcoidosis | ILD          | Emphysema    | Sleep apnea   | CRF          | PH          | No CRD |
|-------------------------------|-----------|--------------|---------------|--------------|-----------------------|--------------|--------------|---------------|--------------|-------------|--------|
| <b>Number of patients (%)</b> | 13 (0.1)  | 698 (4.3)    | 3013 (26.0)   | 2641 (22.8)  | 115 (1.0)             | 1171 (10.1)  | 734 (6.3)    | 2480 (21.4)   | 529 (4.6)    | 217 (1.9)   |        |
| Pulmonary embolism n (%)      | 0 (0)     | 30 (4.3)     | 85 (2.8)      | 84 (3.2)     | 8 (7.0)               | 69 (5.9) *   | 54 (7.4) *   | 106 (4.3) *   | 12 (2.3)     | 26 (12.0) * | 3.32%  |
| VAP n (%)                     | 1 (7.7)   | 32 (4.6) \$  | 234 (7.8)     | 254 (9.6) *  | 21 (18.3) *           | 230 (19.6) * | 123 (16.8) * | 499 (20.1) *  | 38 (7.2)     | 32 (14.8) * | 7.9%   |
| Pneumocystis pneumonia n (%)  | 0         | 0            | 0             | 0            | 0                     | 0            | 0            | 0             | 0            | 0           | 0%     |
| Aspergillosis pneumonia n (%) | 1 (7.7) * | 0 (0)        | 10 (0.3) *    | 10 (0.4) *   | 0 (0)                 | 9 (0.8) *    | 6 (0.8) *    | 8 (0.3)       | 3 (0.6)      | 1 (0.5)     | 0.2%   |
| Pleural empyema n (%)         | 0 (0)     | 6 (0.9) *    | 3 (0.1)       | 2 (0.1)      | 1 (0.9)               | 2 (0.2)      | 1 (0.1)      | 2 (0.1)       | 0 (0)        | 0 (0)       | 0.1%   |
| Lung abscess n (%)            | 0 (0)     | 4 (0.6) *    | 2 (0.1)       | 0 (0)        | 0 (0)                 | 9 (0.1) *    | 6 (0.1) *    | 2 (0.1)       | 1 (0.2)      | 0 (0)       | 0.1%   |
| Pneumothorax n (%)            | 1 (7.7) * | 9 (1.3) *    | 15 (0.5)      | 7 (0.3)      | 0 (0)                 | 15 (1.3) *   | 24 (3.3) *   | 19 (0.8) *    | 3 (0.6)      | 2 (0.9)     | 0.3%   |
| Acute respiratory failure (%) | 2 (15.4)  | 241 (34.5) * | 1062 (35.3) * | 716 (27.1) * | 29 (25.2)             | 516 (44.1) * | 271 (37.0) * | 1003 (40.4) * | 203 (38.4) * | 94 (43.3) * | 25.2%  |
| ICU (%)                       | 1 (7.7)   | 74 (10.6) \$ | 503 (16.7) *  | 463 (17.5) * | 35 (30.4)             | 364 (31.1) * | 200 (27.3) * | 807 (32.5) *  | 91 (17.2)    | 57 (26.3) * | 14.9%  |
| In-hospital death (%)         | 0 (0)     | 293 (42.0) * | 750 (24.9) *  | 223 (8.4) \$ | 24 (20.9)             | 227 (19.4) * | 135 (18.4)   | 426 (17.2)    | 152 (28.7) * | 60 (27.7) * | 16.1%  |

\* significantly more frequent in the chronic respiratory disease group compared to the group with no chronic respiratory disease (p<0.05)

\$ significantly less frequent in the chronic respiratory disease group compared to the group with no chronic respiratory disease (p<0.05)

CRF: chronic respiratory failure, PH: pulmonary hypertension, COPD: chronic obstructive pulmonary disease, ILD: interstitial lung disease, CF: cystic fibrosis, VAP: ventilator-associated pneumonia, No CRD: No chronic respiratory disease

**Supplementary Table S5· Risk of intensive care requiring and mortality for the patients hospitalized in France for COVID-19 (from March 1 to April 30, 2020) according to their chronic respiratory disease (only one CRD)**

|                       | ICU                     | Death                   |
|-----------------------|-------------------------|-------------------------|
|                       | Adjusted OR [95% IC]    | Adjusted OR [95% IC]    |
| No CRD                | 1                       | 1                       |
| CF                    | 0.46 [0.1-3.60]         | -                       |
| Lung cancer           | <b>0.72 [0.57-0.93]</b> | 3.95 [3.36-4.64]        |
| COPD                  | 0.96 [0.87-1.07]        | 1.09 [1.01-1.19]        |
| Asthma                | 1.15 [1.04-1.28]        | <b>0.81 [0.70-0.94]</b> |
| Pulmonary sarcoidosis | 2.22 [1.47-3.38]        | 2.12 [1.31-3.243]       |
| ILD                   | 2.29 [2.01-2.61]        | 1.07 [0.92-1.25]        |
| Emphysema             | 1.92 [1.62-2.28]        | 1.01 [0.83-1.23]        |
| Sleep apnea           | 1.38 [1.26-1.52]        | 0.93 [0.83-1.04]        |
| CRF                   | 1.02 [0.80-1.29]        | 1.30 [1.06-1.58]        |
| PH                    | 1.81 [1.31-2.49]        | 1.21 [0.88-1.66]        |

Chronic respiratory diseases significantly less at risk are bolded

OR adjusted on obesity, diabetes, hypertension, heart failure, atherosclerotic heart disease, sex, and age as a continuous variable.

CRF: chronic respiratory failure, PH: pulmonary hypertension, COPD: chronic obstructive pulmonary disease, ILD: interstitial lung disease, CF: cystic fibrosis, VAP: ventilator-associated pneumonia, No CRD: No chronic respiratory disease
